# Supplementary material for: Critically appraised topic on adverse food reactions of companion animals (9): time to flare of cutaneous signs after a dietary challenge in dogs and cats with food allergies
Source: BMC Vet Res. 2020 May 24;16:158. doi: 10.1186/s12917-020-02379-3 (PMC7247231; doi:10.1186/s12917-020-02379-3)
Supplement: Supplementary file 1 — Additional file 1. Supplementary Table 1 Data from studies reporting information from dogs with food allergies. [file 12917_2020_2379_MOESM1_ESM.xlsx]

## Sheet: Sheet1
	Supplementary Table 1: data from studies reporting information from dogs with food allergies
									Time to Flare after Oral Food Challenge (Days)
Ref #	Year	Journal Abbreviation	Author	Source	Experimental or Spontaneous	Predominant Clinical Signs	Oral Food Challenge Type	# Dogs with AFR	# Positive Challenges	1	%	2	%	3	%	4	%	5	%	6	%	7	%	8	%	9	%	10	%	11	%	12	%	13	%	14	%	>14	%
	1990	Vet Dermatol	Carlotti	B	spontaneous	cutaneous	original diet	33	33	2	0.0606061	31			0.939394	0	0	0	0	0	0	0	0	0	0	0	0	0	0	0	0	0	0	0	0	0	0	0	0
	1993	J Amer Vet Med Assoc	Rosser	CAB, WOS	spontaneous - AFR	cutaneous	original diet	51	45	9	0.2	32			0.711111	0	0	0	0	0	0	3					0.0666667	0	0	0	0	0	0	0	0	1	0.0222222	0	0
	1993	J Small Anim Pract	Harvey	CAB, WOS	spontaneous - AFR	cutaneous	6-9 individual items	25	25	0	0	4	0.16	1	0.04	1	0.04	7	0.28	0	0	8	0.32	0	0	0	0	3	0.12	0	0	0	0	0	0	1	0.04	0	0
	2000	J Vet Int Med	Vaden	WOS	experimental FA	cutaneous and digestive	7 individual items	6	6	6			1	0	0	0	0	0	0	0	0	0	0	0	0	0	0	0	0	0	0	0	0	0	0	0	0	0	0
	2001	J Amer Vet Med Assoc	Leistra	CAB, WOS	spontaneous - AFR	cutaneous	3 new diets	40	114	8	0.0701754	57											0.5	46													0.403509	3	0.0263158
	2002	J Vet Med Sci	Fujimura	B	spontaneous	cutaneous	single ingredient (tomato)	1	1	1	1	0	0	0	0	0	0	0	0	0	0	0	0	0	0	0	0	0	0	0	0	0	0	0	0	0	0	0	0
	2003	Vet Dermatol	Jackson	CAB, WOS	experimental FA	cutaneous	one diet, corn, soy	14	27	27			1	0	0	0	0	0	0	0	0	0	0	0	0	0	0	0	0	0	0	0	0	0	0	0	0	0	0
	2006	Vet Dermatol	Loeffler	CAB, WOS	spontaneous - AFR	cutaneous	original diet	25	25	23					0.92	1	0.0368	0	0	0	0	1	0.04	0	0	0	0	0	0	0	0	0	0	0	0	0	0	0	0
					spontaneous - AFR+AD	cutaneous		29	29	0	0	0	0	29					1	0	0	0	0	0	0	0	0	0	0	0	0	0	0	0	0	0	0	0	0
	2019	Vet Dermatol	Favrot	CAB, WOS	spontaneous	cutaneous	original diet and individual items	10	10	2	0.2	2	0.2	2	0.2	1	0.1	0	0	0	0	1	0.1	1	0.1	0	0	1	0.1	0	0	0	0	0	0	0	0	0	0
	abbreviations: AD: atopic dermatitis; AFR: adverse food reactions; B: bibliography; CAB: CAB abstracts; FA: food allergy; WOS: Web of Science						TOTAL	234	315
						DAY OF FLARE AFTER CHALLENGE			1	2	3	4	5	6	7	8	9	10	11	12	13	14	> 14
						CUMULATIVE NUMBER OF DOGS WITH EVALUABLE DATA BY THAT DAY			257	290	315	315	315	315	315	315	315	315	315	315	315	315	315
						CUMULATIVE NUMBER OF DOGS WITH FLARES BY THAT DAY			22	61	150	153	189	189	256	257	260	264	264	264	264	312	315
								CUMULATIVE % OF DOGS WITH FLARES BY THAT DAY	0.0856031	0.210345	0.47619	0.485714	0.6	0.6	0.812698	0.815873	0.825397	0.838095	0.838095	0.838095	0.838095	0.990476	1
