# Supplementary material for: Critically appraised topic on adverse food reactions of companion animals (9): time to flare of cutaneous signs after a dietary challenge in dogs and cats with food allergies
Source: BMC Vet Res. 2020 May 24;16:158. doi: 10.1186/s12917-020-02379-3 (PMC7247231; doi:10.1186/s12917-020-02379-3)
Supplement: Supplementary file 2 — Additional file 2. Supplementary Table S2 Data from studies reporting information from cats with food allergies. [file 12917_2020_2379_MOESM2_ESM.xlsx]

## Sheet: Sheet1
	Supplementary Table 2: data from studies reporting information from cats with food allergies
										Time to Flare after Oral Food Challenge (Days)
Ref #	Year	Journal Abbreviation	Author	Source	Experimental or Spontaneous	Predominant Clinical Signs	Oral Food Challenge Type	# Cats with AFR	# Positive Challenges	1	%	2	%	3	%	4	%	5	%	6	%	7	%	8	%	9	%	10	%	11	%	12	%	13	%	14	%	>14	%
	1993	Prat Med Chir Anim Comp	Guaguère	B	spontaneous	cutaneous	original diet	17	10	3	0.3	0	0	3	0.3	0	0	2	0.2	0	0	2	0	0	0	0	0	0	0	0	0	0	0	0	0	0	0	0	0
	1994	J Amer Vet Med Assoc	Reedy	B	spontaneous	cutaneous	single ingredient	1	1	0	0	0	0	1	1	0	0	0	0	0	0	0	0	0	0	0	0	0	0	0	0	0	0	0	0	0	0	0	0
	2013	Jpn J Vet Dermatol	Scott	CAB	spontaneous	cutaneous	original diet (44) or individual ingredients (4)	48	48	48													1	0	0	0	0	0	0	0	0	0	0	0	0	0	0	0	0
	2013	Aust Vet J	Vogelnest	WoS	spontaneous	cutaneous	original diet ± individual ingredients	17	13	4			0.307692	0	0	1	0.0769231	1	0.0769231	0	0	3	0.230769	0	0	0	0	1	0.0769231	0	0	0	0	0	0	3	0.230769	0	0
	abbreviations: B: bibliography; CAB: CAB abstracts; WOS: Web of Science
							TOTAL	83	72
						DAY OF FLARE AFTER CHALLENGE			1	2	3	4	5	6	7	8	9	10	11	12	13	14	> 14
						CUMULATIVE NUMBER OF CATS WITH EVALUABLE DATA BY THAT DAY			11	24	24	24	24	24	72	72	72	72	72	72	72	72	72
						CUMULATIVE NUMBER OF CATS WITH FLARES BY THAT DAY			3	7	11	12	15	15	68	68	68	69	69	69	69	72	72
								CUMULATIVE % OF CATS WITH FLARES BY THAT DAY	0.272727	0.291667	0.458333	0.5	0.625	0.625	0.944444	0.944444	0.944444	0.958333	0.958333	0.958333	0.958333	1	1
